# Supplementary material for: Prognostic Characteristics and Immune Effects of N6-Methyladenosine and 5-Methylcytosine-Related Regulatory Factors in Clear Cell Renal Cell Carcinoma
Source: Front Genet. 2022 Apr 27;13:864383. doi: 10.3389/fgene.2022.864383 (PMC9092148; doi:10.3389/fgene.2022.864383)
Supplement: Supplementary file 1 [file Table2.xlsx]

## Sheet: Table 2 (1)
id	HR	HR.95L	HR.95H	pvalue
NOP2	1.12425	1.09146	1.15801	8.76e-15
METTL14	0.664255	0.577236	0.764393	1.13e-08
LRPPRC	0.933252	0.908551	0.958624	4.48e-07
NSUN5	1.13744	1.07892	1.19913	1.76e-06
HNRNPA2B1	1.01695	1.00884	1.02513	3.88e-05
ZC3H13	0.895221	0.840204	0.953841	0.00062545
METTL3	1.12091	1.04326	1.20434	0.00183242
NSUN2	1.0749	1.02414	1.12819	0.00343256
RBMX	0.971338	0.952349	0.990706	0.00389089
YTHDF3	0.953882	0.922074	0.986787	0.00635887
FMR1	0.899573	0.832972	0.971499	0.00700243
FTO	0.944227	0.905636	0.984462	0.00702777
NSUN4	0.795038	0.667566	0.946851	0.0100969
ALYREF	1.02134	1.00432	1.03865	0.0137791
IGFBP2	1.0076	1.00022	1.01504	0.0435671
RBM15B	0.934997	0.861768	1.01445	0.106258
RBM15	0.853404	0.696004	1.0464	0.127524
TET3	1.10883	0.925747	1.32813	0.261857
WTAP	1.01985	0.984468	1.0565	0.275278
IGFBP3	1.00016	0.999825	1.0005	0.347062
ALKBH5	0.995559	0.981633	1.00968	0.535784
TET1	1.08901	0.530052	2.23741	0.81646
